# Supplementary material for: Comparison of CLEIA and ELISA for SARS-CoV-2 Virus Antibodies after First and Second Dose Vaccinations with the BNT162b2 mRNA Vaccine
Source: MDPI journal article supplement (doi:10.3390/vaccines10040487), 2022-03-22
Supplement: s1 [file s1]

# Comparison of CLEIA and ELISA for SARS-CoV-2 virus anti-bodies after first and second dose vaccinations with the BNT162b2 mRNA Vaccine

Mohammad Said Ashenagar<sup>1\*</sup>, Akiko Matsumoto<sup>1\*</sup>, Hironori Sakai<sup>2</sup>, Mikiko Tokiya<sup>1</sup>, Megumi Hara<sup>3</sup>, and Yoshio Hirota<sup>4</sup>

## Supplementary Files

Table S1. Reproducibility of antibody test results using ELISA based on the optical density (O.D.) at 450 nm.

| Level                    | S1 IgM |      | S1 IgG |      | NP IgG |      |
|--------------------------|--------|------|--------|------|--------|------|
|                          | L      | H    | L      | H    | L      | H    |
| Absorbance (O.D. 450 nm) |        |      |        |      |        |      |
| Mean                     | 0.05   | 1.25 | 0.05   | 1.06 | 0.06   | 1.29 |
| SD                       | 0.00   | 0.16 | 0.00   | 0.10 | 0.00   | 0.13 |
| CV (%)                   | 6.5    | 13.0 | 6.2    | 9.5  | 5.3    | 9.9  |

Control samples were repeatedly measured ten times by each assay. SD, standard deviation. CV, coefficient of variation. S1, anti-spike protein S1 subunit antibody; NP, anti-nucleocapsid protein antibody. L, low concentration control; H, high concentration control.

Table S2. Number of blood samples taken from the participants.

| Week after first dose | 0  | 1  | 2  | 3  | 4  | 5  | 6  | 7   | 11 | 15 | SUM |
|-----------------------|----|----|----|----|----|----|----|-----|----|----|-----|
| Healthcare workers    | 20 | 20 | 19 | 19 | 18 | 19 | 19 | 19  | 19 | 19 | 191 |
| Hospital staff        | —  | —  | —  | —  | —  | —  | —  | 59  | —  | —  | 59  |
| Students              | 42 | —  | —  | 42 | —  | —  | —  | 42  | 41 | 41 | 208 |
| SUM                   | 62 | 20 | 19 | 61 | 18 | 19 | 19 | 120 | 60 | 60 | 458 |
